# Supplementary material for: Two-dimensional β-PdSeO3 monolayer as a high-efficiency photocatalyst for solar-to-hydrogen conversion
Source: Royal Society of Chemistry journal article supplement (doi:10.1039/d2cy01292h), 2022-01-01
Supplement: d2cy01292h1.pdf [file d2cy01292h1.pdf]

## Supporting Information

### **Two-dimensional $\beta$ -PdSeO<sub>3</sub> monolayer as a high-efficiency photocatalyst for solar-to-hydrogen conversion**

Man Qiao,<sup>†</sup> Yafei Li,<sup>‡\*</sup>

<sup>†</sup> Institute of Advanced Materials and Flexible Electronics (IAMFE), School of Chemistry and Materials Science, Nanjing University of Information Science & Technology, 210044, Nanjing, China

<sup>‡</sup> Jiangsu Collaborative Innovation Centre of Biomedical Functional Materials, School of Chemistry and Materials Science, Nanjing Normal University, Nanjing 210023, China

\* To whom correspondence should be addressed. Email: [liyafei@njnu.edu.cn](mailto:liyafei@njnu.edu.cn) (YL)

**Table S1.** Structural properties of  $\beta$ -PdSeO<sub>3</sub> bulk and monolayer.

|                       | a    | b    | c    | $d_{\text{Pd-OI}}$ | $d_{\text{Pd-OII}}$ | $d_{\text{Se-OI}}$ | $d_{\text{Se-OII}}$ |
|-----------------------|------|------|------|--------------------|---------------------|--------------------|---------------------|
| Bulk                  | 6.85 | 7.03 | 6.96 | 2.01               | 2.03                | 1.71               | 1.84                |
| Bulk-Exp <sup>a</sup> | 6.79 | 7.03 | 7.01 | 2.02               | 2.01                | 1.69               | 1.76                |
| Monolayer             | 6.78 | 7.02 | /    | 2.03               | 2.02                | 1.71               | 1.83                |

<sup>a</sup> Arndt, A.; Wickleder, M. S. Pd(SeO<sub>3</sub>), Pd(SeO<sub>4</sub>), and Pd(Se<sub>2</sub>O<sub>5</sub>): The First Palladium Oxoselenates. *Eur. J. Inorg. Chem.* **2007**, 27, 4335 – 4339.

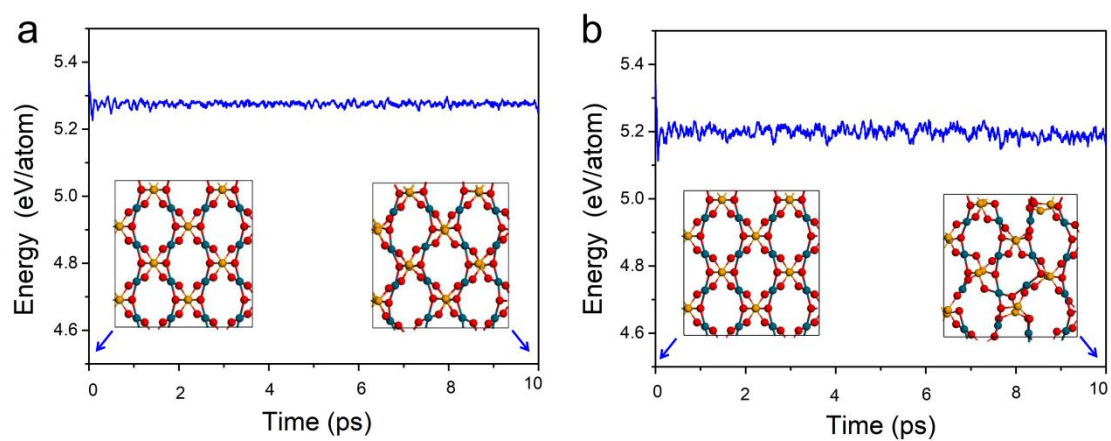

**Figure S1.** The evolution of the total energy of first principles molecular dynamics (FPMD) simulations for  $\beta$ -PdSeO<sub>3</sub> monolayer at (a) 500 K and (b) 1000 K. The insets are snapshot structures of  $\beta$ -PdSeO<sub>3</sub> monolayer at 0 ps and 10 ps.

## Solar driven water splitting processes on 2D $\beta$ -PdSeO<sub>3</sub> monolayer

The thermodynamics pathways of hydrogen reduction and water oxidation were examined to estimate the catalytic activity of 2D  $\beta$ -PdSeO<sub>3</sub> monolayer for water splitting.

The two electron reaction pathway of hydrogen evolution reaction (HER) can be written as:

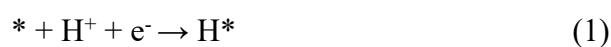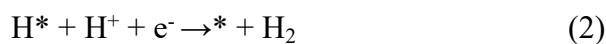

Meanwhile, the four electron reaction pathway of oxygen evolution reaction (OER) can be written as:

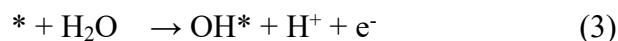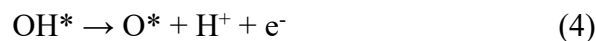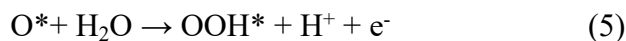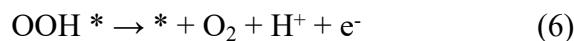

where  $*$  denotes the adsorption site,  $H^*$ ,  $OH^*$ ,  $O^*$  and  $OOH^*$  denote the adsorbed intermediates.

The Gibbs free energy difference ( $\Delta G$ ) of HER and OER is calculated by computational hydrogen electrode (CHE) method proposed by Nørskov et al.  $\Delta G$  can be computed as below:

$$\Delta G = \Delta E + \Delta E_{ZPE} - T\Delta S + \Delta G_{pH} + \Delta G_U$$

where  $\Delta E$  is the DFT computed adsorption energy,  $\Delta E_{ZPE}$  and  $\Delta S$  are the zero point energy and the entropy difference between the adsorbed state and the gas phase at 298.15 K, respectively.  $\Delta G_{pH}$  refers to the free energy contribution in different pH. In

this work, the pH of the solution is assumed to be acid medium (pH = 0).  $\Delta G_u$  denotes the light-induced potential bias (U) and equals to  $-eU$ . Thus, the free energy difference of elementary steps of HER and OER can be written as:

$$\Delta G_1 = G_{H^*} - G^* - 1/2 G_{H_2} - \Delta G_U + \Delta G_{pH} \quad (7)$$

$$\Delta G_2 = G^* - G_{H^*} + 1/2 G_{H_2} - \Delta G_U + \Delta G_{pH} \quad (8)$$

$$\Delta G_3 = G_{OH^*} + 1/2 G_{H_2} - G_{H_2O} - G^* - \Delta G_U - \Delta G_{pH} \quad (9)$$

$$\Delta G_4 = G_{O^*} + 1/2 G_{H_2} - G_{OH^*} - \Delta G_U - \Delta G_{pH} \quad (10)$$

$$\Delta G_5 = G_{OOH^*} + 1/2 G_{H_2} - G_{H_2O} - G_{O^*} - \Delta G_U - \Delta G_{pH} \quad (11)$$

$$\Delta G_6 = G^* + 1/2 G_{H_2} + G_{O_2} - G_{OOH^*} - \Delta G_U - \Delta G_{pH} \quad (12)$$

Computation details of formation energy and cleavage energy of PdSeO<sub>3</sub>
